# Supplementary material for: MUC1-C nuclear localization drives invasiveness of renal cancer cells through a sheddase/gamma secretase dependent pathway
Source: PubMed Central journal article supplement (PMC3996672; doi:10.18632/oncotarget.1768), 2014-02-02
Supplement: oncotarget-05-754-s001.pdf [file oncotarget-05-754-s001.pdf]

**MUC1-C nuclear localization drives invasiveness of renal cancer cells through a sheddase/gamma secretase dependent pathway - Bouillez et al**

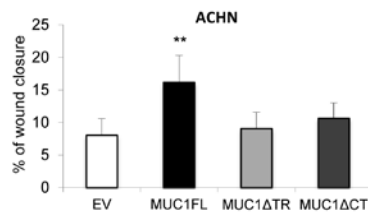

**Figure 1S: Extra- and intra-cellular domains of MUC1 increase migratory properties.** Confluent monolayers of ACHN cells stably transfected with empty vector or with different constructs of MUC1 were scraped from one side of the reference line. Wounds healing were measured at 0 and 6 hours and percentage of wound closure was determined. Values are means s.e.m and represent five separate experiments (\*\* p<0.01).

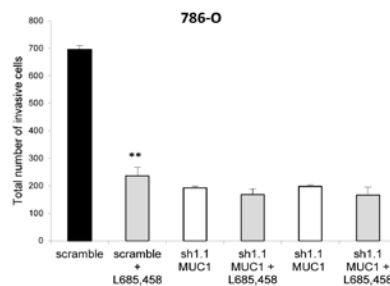

**Figure 2S: MUC1-induced invasion in 786-O cells is dependent of  $\gamma$ -secretase activity.** Invasion of 786-O cells stably transfected with scramble, *sh1.1* or *sh1.2* targeting MUC1 cells was evaluated using 24-well Matrigel<sup>®</sup> invasion chambers with 10% fetal calf serum as chemoattractant. Cells were treated or not with 10 ng/ml of  $\gamma$ -secretase inhibitor, L685,458. The graphs show the total number of invasive cells counted 24h after seeding. Values are means s.e.m and represent five separate experiments (\*\* p<0.01).

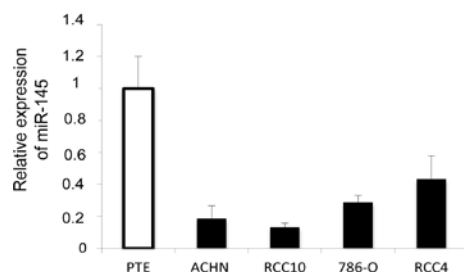

**Figure 3S: miR-145 expression is down-regulated in renal carcinoma cells.** miR-145 expression was measured in primary proximal tubular epithelial cells (PTE), ACHN, RCC4, RCC10 and 786-O cancer cell lines by Taqman real-time PCR as described in [48, 49]. RNU48 was used as normalizer.
